# Supplementary material for: Associations of Dietary ω-3, ω-6 Fatty Acids Consumption with Sleep Disorders and Sleep Duration among Adults
Source: MDPI journal article supplement (doi:10.3390/nu13051475), 2021-04-27
Supplement: s1 [file s1]

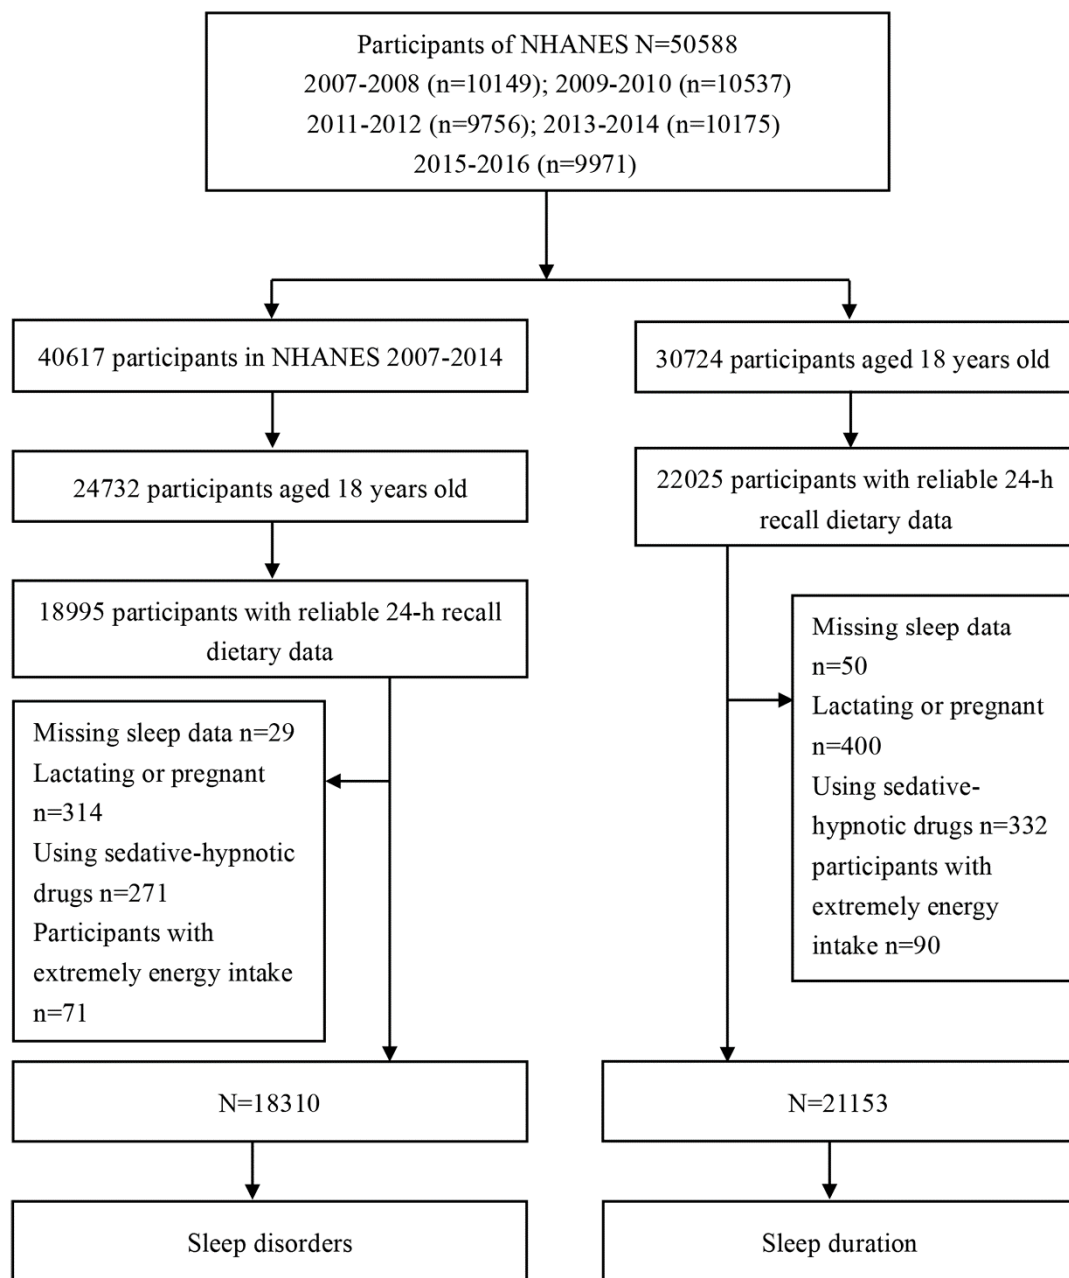

**Figure S1.** Flow chart of the screening process for the selection of eligible participants.

**Table S1.** The classifications of categorical covariates

| Covariates                             | Classifications              |                |                               |                                           |                        |
|----------------------------------------|------------------------------|----------------|-------------------------------|-------------------------------------------|------------------------|
| Age group                              | 18-44 years,                 |                | 44-59 years,                  |                                           | ≥60years               |
| Gender                                 | Males                        |                | Females                       |                                           |                        |
| Race/ethnicity                         | Mexican American,            | Other Hispanic | Non-Hispanic White,           | Non-Hispanic Black,                       | Other races            |
| Marital status                         | Married/Living with partner, |                |                               | Windowed/divorced/separated/Never married |                        |
| Educational level                      | Below high school            |                | High school,                  |                                           | Above high school      |
| Annual household income                | <\$20000,                    |                | ≥\$20000,                     |                                           |                        |
| Body mass index                        | < 25 kg/m <sup>2</sup> ,     |                | 25 to <30 kg/m <sup>2</sup> , |                                           | ≥ 30 kg/m <sup>2</sup> |
| Work activity level                    | Vigorous activity,           |                | Moderate activity,            |                                           | Other                  |
| Recreational activity level            | Vigorous activity,           |                | Moderate activity,            |                                           | Other                  |
| Smoking at least 100cigarettes in life | Yes,                         |                | No,                           |                                           |                        |
| Have at least 12 alcohol drinks/years  | Yes,                         |                | No,                           |                                           |                        |
| Hypertension                           | Yes,                         |                | No,                           |                                           |                        |
| Diabetes                               | Yes,                         |                | No,                           |                                           |                        |
| Depressive symptoms                    | Yes,                         |                | No,                           |                                           |                        |
| Sampling seasons                       | November 1 through April 30  |                |                               | May 1 through October 31                  |                        |
| Caffeine intake                        | Continuous variable          |                |                               |                                           |                        |
| Energy intake                          | Continuous variable          |                |                               |                                           |                        |

**Table S2.** Weighted odds ratios (95% confidence intervals) of sleep disorders across tertiles of energy-adjusted dietary  $\omega$ -3,  $\omega$ -6 fatty acid intake and  $\omega$ -6:  $\omega$ -3 ratios in fully adjusted model, stratified by gender, NHANES 2007-2014

|                                    | Male                |                      |                      | Female             |                      |                      |
|------------------------------------|---------------------|----------------------|----------------------|--------------------|----------------------|----------------------|
|                                    | Crude               | Model 1 <sup>a</sup> | Model 2 <sup>b</sup> | Crude              | Model 1 <sup>a</sup> | Model 2 <sup>b</sup> |
| Adjusted $\omega$ -3 (mg/kcal/day) |                     |                      |                      |                    |                      |                      |
| <0.65                              | 1.00 (ref)          | 1.00 (ref)           | 1.00 (ref)           | 1.00 (ref)         | 1.00 (ref)           | 1.00 (ref)           |
| 0.65 to <0.91                      | 1.01 (0.78-1.32)    | 0.97 (0.75-1.26)     | 0.98 (0.73-1.32)     | 1.00 (0.78-1.27)   | 0.96 (0.75-1.24)     | 1.00 (0.73-1.37)     |
| $\geq 0.91$                        | 0.80 (0.61-1.07)    | 0.72 (0.54-0.97) *   | 0.68 (0.49-0.95) *   | 1.04 (0.82-1.35)   | 0.98 (0.75-1.27)     | 1.08 (0.81-1.44)     |
| Adjusted $\omega$ -6 (mg/kcal/day) |                     |                      |                      |                    |                      |                      |
| <6.18                              | 1.00 (ref)          | 1.00 (ref)           | 1.00 (ref)           | 1.00 (ref)         | 1.00 (ref)           | 1.00 (ref)           |
| 6.18 to <8.32                      | 1.44 (1.09-1.90) *  | 1.42 (1.07-1.88) *   | 1.49 (1.10-2.02) *   | 0.93 (0.69-1.24)   | 0.92 (0.68-1.24)     | 1.06 (0.77-1.46)     |
| $\geq 8.32$                        | 1.16 (0.84-1.61)    | 1.08 (0.78-1.50)     | 1.01 (0.70-1.49)     | 1.10 (0.80-1.50)   | 1.04 (0.76-1.42)     | 1.10 (0.79-1.54)     |
| $\omega$ -6: $\omega$ -3 ratio     |                     |                      |                      |                    |                      |                      |
| <8.19                              | 1.00 (ref)          | 1.00 (ref)           | 1.00 (ref)           | 1.00 (ref)         | 1.00 (ref)           | 1.00 (ref)           |
| 8.18-10.15                         | 1.53 (1.13-2.08) ** | 1.65 (1.20-2.27) **  | 1.72 (1.22-2.43) **  | 1.32 (1.00-1.74) * | 1.37 (1.04-1.80) *   | 1.20 (0.89-1.63)     |
| $\geq 10.15$                       | 1.66 (1.25-2.20) ** | 1.81 (1.36-2.40) **  | 1.82 (1.33-2.49) **  | 1.07 (0.81-1.42)   | 1.11 (0.84-1.47)     | 0.98 (0.70-1.37)     |

Calculated using binary logistic regression models. <sup>a</sup>Model 1 adjusted for age. <sup>b</sup>Model 2 adjusted for age, race/ethnicity, educational level, annual household income, recreational physical activity, work physical activity, drinking status, smoking, hypertension, diabetes, depressive symptoms, body mass index, marital status, sampling seasons. \* p<0.05; \*\* p<0.01.

**Table S3.** Weighted odds ratios (95% confidence intervals) of sleep disorders across tertiles of energy-adjusted dietary  $\omega$ -3,  $\omega$ -6 fatty acid intake and  $\omega$ -6:  $\omega$ -3 ratios in fully adjusted model, stratified by age, NHANES 2007-2014

|                                    | 18 ≤ Age < 45 Years    |                        |                       | 45 ≤ Age < 60 Years    |                        |                        | Age ≥ 60 Years        |                        |                       |
|------------------------------------|------------------------|------------------------|-----------------------|------------------------|------------------------|------------------------|-----------------------|------------------------|-----------------------|
|                                    | Crude                  | Model 1 <sup>a</sup>   | Model 2 <sup>b</sup>  | Crude                  | Model 1 <sup>a</sup>   | Model 2 <sup>b</sup>   | Crude                 | Model 1 <sup>a</sup>   | Model 2 <sup>b</sup>  |
| Adjusted $\omega$ -3 (mg/kcal/day) |                        |                        |                       |                        |                        |                        |                       |                        |                       |
| <0.65                              | 1.00 (ref)             | 1.00 (ref)             | 1.00 (ref)            | 1.00 (ref)             | 1.00 (ref)             | 1.00 (ref)             | 1.00 (ref)            | 1.00 (ref)             | 1.00 (ref)            |
| 0.65 to <0.91                      | 1.09<br>(0.82-1.46)    | 1.10<br>(0.81-1.46)    | 1.34<br>(0.95-1.87)   | 0.96<br>(0.69-1.35)    | 0.96<br>(0.68-1.34)    | 0.89<br>(0.61-1.32)    | 0.82<br>(0.63-1.07)   | 0.83<br>(0.64-1.07)    | 0.81<br>(0.61-1.08)   |
| ≥0.91                              | 0.87<br>(0.60-1.25)    | 0.87<br>(0.61-1.26)    | 1.00<br>(0.68-1.48)   | 0.67<br>(0.46-0.98) *  | 0.67<br>(0.46-0.97) *  | 0.67<br>(0.46-0.97) *  | 0.97<br>(0.70-1.33)   | 1.00<br>(0.73-1.37)    | 0.95<br>(0.68-1.33)   |
| Adjusted $\omega$ -6 (mg/kcal/day) |                        |                        |                       |                        |                        |                        |                       |                        |                       |
| <6.18                              | 1.00 (ref)             | 1.00 (ref)             | 1.00 (ref)            | 1.00 (ref)             | 1.00 (ref)             | 1.00 (ref)             | 1.00 (ref)            | 1.00 (ref)             | 1.00 (ref)            |
| 6.18 to <8.32                      | 1.15<br>(0.81-1.65)    | 1.16<br>(0.81-1.66)    | 1.32<br>(0.90-1.94)   | 1.15<br>(0.84-1.60)    | 1.15<br>(0.84-1.57)    | 1.25<br>(0.86-1.81)    | 1.26<br>(0.92-1.71)   | 1.28<br>(0.94-1.74)    | 1.40<br>(0.99-1.97)   |
| ≥8.32                              | 1.04<br>(0.73-1.49)    | 1.05<br>(0.73-1.51)    | 1.06<br>(0.72-1.56)   | 0.83<br>(0.57-1.22)    | 0.83<br>(0.57-1.21)    | 0.85<br>(0.58-1.26)    | 1.51<br>(1.04-2.20) * | 1.57<br>(1.09-2.26) ** | 1.50<br>(1.00-2.24) * |
| $\omega$ -6: $\omega$ -3 ratio     |                        |                        |                       |                        |                        |                        |                       |                        |                       |
| <8.19                              | 1.00 (ref)             | 1.00 (ref)             | 1.00 (ref)            | 1.00 (ref)             | 1.00 (ref)             | 1.00 (ref)             | 1.00 (ref)            | 1.00 (ref)             | 1.00 (ref)            |
| 8.18-10.15                         | 1.54<br>(1.14-2.07) ** | 1.53<br>(1.14-2.06) ** | 1.46<br>(1.06-2.02) * | 1.78<br>(1.23-2.58) ** | 1.79<br>(1.24-2.59) ** | 1.72<br>(1.17-2.54) ** | 1.15<br>(0.84-1.56)   | 1.16<br>(0.85-1.56)    | 1.09<br>(0.78-1.53)   |
| ≥10.15                             | 1.32<br>(0.98-1.79)    | 1.32<br>(0.97-1.78)    | 1.08<br>(0.75-1.54)   | 1.63<br>(1.09-2.43) *  | 1.63<br>(1.09-2.44) *  | 1.70<br>(1.11-2.61) *  | 1.42<br>(1.09-1.86) * | 1.40<br>(1.08-1.85) *  | 1.30<br>(0.98-1.75)   |

Calculated using binary logistic regression. <sup>a</sup> Model 1 adjusted for gender. <sup>b</sup> Model 2 adjusted for gender, race/ethnicity, educational level, annual household income, recreational physical activity, work physical activity, drinking status, smoking, hypertension, diabetes, depressive symptoms, body mass index, marital status, sampling seasons. \* p<0.05; \*\* p<0.01.

**Table S4.** Weighted odds ratios (95% confidence intervals) of sleep disorders across tertiles of energy-adjusted dietary  $\omega$ -3,  $\omega$ -6 fatty acid intake and  $\omega$ -6:  $\omega$ -3 ratios in fully adjusted model, NHANES 2007-2014

|                                                           | Cases/Participants | Total participants <sup>a</sup> | Males <sup>a</sup>  | Females <sup>a</sup> |
|-----------------------------------------------------------|--------------------|---------------------------------|---------------------|----------------------|
| <b>Adjusted <math>\omega</math>-3 (mg/kcal/day)</b>       |                    |                                 |                     |                      |
| <0.64                                                     | 603/6193           | 1.00 (ref)                      | 1.00 (ref)          | 1.00 (ref)           |
| 0.64 to <0.92                                             | 584/6189           | 0.92 (0.75-1.13)                | 0.75 (0.57-0.99) *  | 0.88 (0.64-1.22)     |
| $\geq$ 0.92                                               | 606/6190           | 0.86 (0.72-1.03)                | 0.60 (0.42-0.86) ** | 0.96 (0.69-1.33)     |
| <b>Adjusted <math>\omega</math>-6 (mg/kcal/day)</b>       |                    |                                 |                     |                      |
| <6.18                                                     | 527/6191           | 1.00 (ref)                      | 1.00 (ref)          | 1.00 (ref)           |
| 6.18 to <8.32                                             | 613/6191           | 1.32 (1.07-1.63) *              | 1.70 (1.25-2.31) ** | 1.23 (0.89-1.70)     |
| $\geq$ 8.32                                               | 653/6190           | 1.06 (0.84-1.33)                | 1.48 (1.01-2.16) *  | 1.06 (0.69-1.61)     |
| <b><math>\omega</math>-6: <math>\omega</math>-3 ratio</b> |                    |                                 |                     |                      |
| <8.19                                                     | 526/6191           | 1.00 (ref)                      | 1.00 (ref)          | 1.00 (ref)           |
| 8.18-10.15                                                | 628/6191           | 1.37 (1.14-1.66) **             | 1.61 (1.18-2.19) ** | 1.22 (0.93-1.59)     |
| $\geq$ 10.15                                              | 639/6191           | 1.35 (1.11-1.63) **             | 1.75 (1.29-2.36) ** | 1.03 (0.77-1.37)     |

Calculated using binary logistic regression models. <sup>a</sup>Models adjusted for age, gender, race/ethnicity, educational level, annual household income, recreational physical activity, work physical activity, drinking status, smoking, hypertension, diabetes, depressive symptoms, body mass index, marital status, sampling seasons. \*  $p < 0.05$ ; \*\*  $p < 0.01$

**Table S5.** Weighted relative risk ratios (95% CIs) of sleep duration across tertiles of energy-adjusted dietary  $\omega$ -3,  $\omega$ -6 fatty acid intake and  $\omega$ -6:  $\omega$ -3 ratios in model 2, stratified by gender, NHANES 2007-2016

|                                  | Male                                |                                  |                                   | Female                              |                                  |                                   |
|----------------------------------|-------------------------------------|----------------------------------|-----------------------------------|-------------------------------------|----------------------------------|-----------------------------------|
|                                  | Very Short Sleep<br>( $<5$ h/Night) | Short Sleep<br>(5- $<7$ h/Night) | Long Sleep<br>( $\geq 9$ h/Night) | Very Short Sleep<br>( $<5$ h/Night) | Short Sleep<br>(5- $<7$ h/Night) | Long Sleep<br>( $\geq 9$ h/Night) |
| Adjusted $\omega$ -3 (mg/kg/day) |                                     |                                  |                                   |                                     |                                  |                                   |
| $<0.66$                          | 1.00 (ref)                          | 1.00 (ref)                       | 1.00 (ref)                        | 1.00 (ref)                          | 1.00 (ref)                       | 1.00 (ref)                        |
| 0.66 to $<0.93$                  | 0.67 (0.45-0.99) *                  | 1.02 (0.85-1.22)                 | 0.81 (0.62-1.07)                  | 0.91 (0.65-1.29)                    | 0.94 (0.77-1.15)                 | 0.81 (0.62-1.06)                  |
| $\geq 0.93$                      | 0.53 (0.35-0.81) **                 | 0.79 (0.67-0.93) *               | 0.89 (0.64-1.23)                  | 0.72 (0.52-1.01)                    | 0.90 (0.75-1.07)                 | 1.02 (0.80-1.31)                  |
| Adjusted $\omega$ -6 (mg/kg/day) |                                     |                                  |                                   |                                     |                                  |                                   |
| $<6.27$                          | 1.00 (ref)                          | 1.00 (ref)                       | 1.00 (ref)                        | 1.00 (ref)                          | 1.00 (ref)                       | 1.00 (ref)                        |
| 6.27 to $<8.42$                  | 0.59 (0.39-0.88) **                 | 1.03 (0.86-1.23)                 | 0.92 (0.68-1.24)                  | 0.77 (0.53-1.12)                    | 0.81 (0.68-0.97) *               | 0.84 (0.66-1.08)                  |
| $\geq 8.42$                      | 0.53 (0.34-0.84) **                 | 0.90 (0.77-1.07)                 | 0.89 (0.64-1.23)                  | 0.62 (0.45-0.85) **                 | 0.85 (0.70-1.03)                 | 1.07 (0.82-1.39)                  |
| $\omega$ -6: $\omega$ -3 ratio   |                                     |                                  |                                   |                                     |                                  |                                   |
| $<8.19$                          | 1.00 (ref)                          | 1.00 (ref)                       | 1.00 (ref)                        | 1.00 (ref)                          | 1.00 (ref)                       | 1.00 (ref)                        |
| 8.18-10.15                       | 0.84 (0.61-1.17)                    | 1.09 (0.93-1.27)                 | 0.88 (0.66-1.18)                  | 1.13 (0.77-1.66)                    | 1.02 (0.86-1.22)                 | 0.76 (0.59-1.01)                  |
| $\geq 10.15$                     | 0.99 (0.71-1.39)                    | 1.15 (0.97-1.36)                 | 1.01 (0.73-1.39)                  | 1.14 (0.82-1.58)                    | 0.98 (0.85-1.13)                 | 0.82 (0.63-1.07)                  |

Calculated using multinomial logistic regression models. Model 2 adjusted for age, race/ethnicity, educational level, annual household income, recreational physical activity, work physical activity, drinking status, smoking, hypertension, diabetes, depressive symptoms, body mass index, marital status, sampling seasons. \*  $p<0.05$ ; \*\*  $p<0.01$

**Table S6.** Weighted relative risk ratios (95% CIs) of sleep duration across tertiles of energy-adjusted dietary  $\omega$ -3,  $\omega$ -6 fatty acid intake and  $\omega$ -6:  $\omega$ -3 ratios in model 2, stratified by age, NHANES 2007-2016

| Calculated using multinomial logistic regression models. <sup>a</sup> Model 2 adjusted for gender, race/ethnicity, |                                     |                                   |                                   |
|--------------------------------------------------------------------------------------------------------------------|-------------------------------------|-----------------------------------|-----------------------------------|
|                                                                                                                    | Model 2 <sup>a</sup>                |                                   |                                   |
|                                                                                                                    | Very Short Sleep<br>( $<5$ h/Night) | Short Sleep<br>(5- $<7$ h /Night) | Long Sleep<br>( $\geq 9$ h/Night) |
| <b>18 <math>\leq</math> Age <math>&lt; 45</math> Years</b>                                                         |                                     |                                   |                                   |
| Adjusted $\omega$ -3 (mg/kcal/day)                                                                                 |                                     |                                   |                                   |
| $<0.66$                                                                                                            | 1.00 (ref)                          | 1.00 (ref)                        | 1.00 (ref)                        |
| 0.66 to $<0.93$                                                                                                    | 0.59 (0.41-0.83) **                 | 0.99 (0.80-1.22)                  | 0.94 (0.73-1.22)                  |
| $\geq 0.93$                                                                                                        | 0.59 (0.37-0.92) *                  | 0.80 (0.67-0.96) *                | 1.21 (0.91-1.61)                  |
| Adjusted $\omega$ -6 (mg/kcal/day)                                                                                 |                                     |                                   |                                   |
| $<6.27$                                                                                                            | 1.00 (ref)                          | 1.00 (ref)                        | 1.00 (ref)                        |
| 6.27 to $<8.42$                                                                                                    | 0.47 (0.31-0.71) **                 | 0.99 (0.83-1.18)                  | 0.92 (0.71-1.20)                  |
| $\geq 8.42$                                                                                                        | 0.48 (0.34-0.69) **                 | 0.89 (0.74-1.06)                  | 1.13 (0.84-1.52)                  |
| $\omega$ -6: $\omega$ -3 ratio                                                                                     |                                     |                                   |                                   |
| $<8.19$                                                                                                            | 1.00 (ref)                          | 1.00 (ref)                        | 1.00 (ref)                        |
| 8.18-10.15                                                                                                         | 1.00 (0.61-1.63)                    | 1.08 (0.90-1.30)                  | 0.80 (0.55-1.15)                  |
| $\geq 10.15$                                                                                                       | 0.98 (0.68-1.41)                    | 1.08 (0.90-1.28)                  | 0.88 (0.60-1.30)                  |
| <b>45 <math>\leq</math> Age <math>&lt; 60</math> Years</b>                                                         |                                     |                                   |                                   |
| Adjusted $\omega$ -3 (mg/kcal/day)                                                                                 |                                     |                                   |                                   |
| $<0.66$                                                                                                            | 1.00 (ref)                          | 1.00 (ref)                        | 1.00 (ref)                        |
| 0.66 to $<0.93$                                                                                                    | 1.00 (0.64-1.55)                    | 1.01 (0.78-1.31)                  | 0.67 (0.46-0.96) *                |
| $\geq 0.93$                                                                                                        | 0.72 (0.45-1.15)                    | 0.91 (0.73-1.14)                  | 0.60 (0.42-0.87) **               |
| Adjusted $\omega$ -6 (mg/kcal/day)                                                                                 |                                     |                                   |                                   |
| $<6.27$                                                                                                            | 1.00 (ref)                          | 1.00 (ref)                        | 1.00 (ref)                        |
| 6.27 to $<8.42$                                                                                                    | 0.98 (0.68-1.55)                    | 0.92 (0.72-1.17)                  | 0.71 (0.46-1.09)                  |
| $\geq 8.42$                                                                                                        | 0.70 (0.45-1.08)                    | 0.90 (0.69-1.18)                  | 0.69 (0.43-1.13)                  |
| $\omega$ -6: $\omega$ -3 ratio                                                                                     |                                     |                                   |                                   |
| $<8.19$                                                                                                            | 1.00 (ref)                          | 1.00 (ref)                        | 1.00 (ref)                        |
| 8.18-10.15                                                                                                         | 1.23 (0.80-1.88)                    | 1.08 (0.86-1.36)                  | 0.88 (0.61-1.28)                  |
| $\geq 10.15$                                                                                                       | 1.09 (0.74-1.62)                    | 1.00 (0.82-1.22)                  | 0.96 (0.67-1.37)                  |
| <b>Age <math>\geq 60</math> Years</b>                                                                              |                                     |                                   |                                   |
| Adjusted $\omega$ -3 (mg/kcal/day)                                                                                 |                                     |                                   |                                   |
| $<0.66$                                                                                                            | 1.00 (ref)                          | 1.00 (ref)                        | 1.00 (ref)                        |
| 0.66 to $<0.93$                                                                                                    | 0.93 (0.60-1.43)                    | 0.94 (0.73-1.21)                  | 0.82 (0.58-1.15)                  |
| $\geq 0.93$                                                                                                        | 0.55 (0.36-0.84) **                 | 0.83 (0.66-1.05)                  | 1.00 (0.72-1.38)                  |
| Adjusted $\omega$ -6 (mg/kcal/day)                                                                                 |                                     |                                   |                                   |
| $<6.27$                                                                                                            | 1.00 (ref)                          | 1.00 (ref)                        | 1.00 (ref)                        |
| 6.27 to $<8.42$                                                                                                    | 0.81 (0.52-1.24)                    | 0.80 (0.64-1.01)                  | 0.97 (0.71-1.32)                  |
| $\geq 8.42$                                                                                                        | 0.64 (0.40-1.02)                    | 0.84 (0.67-1.04)                  | 1.07 (0.80-1.42)                  |
| $\omega$ -6: $\omega$ -3 ratio                                                                                     |                                     |                                   |                                   |
| $<8.19$                                                                                                            | 1.00 (ref)                          | 1.00 (ref)                        | 1.00 (ref)                        |
| 8.18-10.15                                                                                                         | 0.77 (0.49-1.20)                    | 1.03 (0.85-1.24)                  | 0.77 (0.59-1.01)                  |
| $\geq 10.15$                                                                                                       | 1.40 (0.81-2.40)                    | 1.15 (0.92-1.43)                  | 0.86 (0.66-1.12)                  |

educational level, annual household income, recreational physical activity, work physical activity, drinking status, smoking, hypertension, diabetes, depressive symptoms, body mass index, marital status, sampling seasons. \*  $p < 0.05$ ; \*\*  $p < 0.01$ .
